# Supplementary material for: Enhanced electrochemical performance of Li–O2 battery based on modifying the solid-state air cathode with Pd catalyst
Source: Royal Society of Chemistry journal article supplement (doi:10.1039/c5ra15206b), 2015-01-01
Supplement: c5ra15206b1.pdf [file c5ra15206b1.pdf]

Electronic Supplementary Information for  
**Enhanced electrochemical performance of Li–O<sub>2</sub> battery based on  
modifying the solid-state air cathode with Pd catalyst**

Xiaofei Wang,<sup>a</sup> Shengrong Cai,<sup>a</sup> Ding Zhu<sup>b</sup> and Yungui Chen<sup>\*a</sup>

(a College of Materials Science and Engineering, Sichuan University, Chengdu 610065, China  
b Institute of New Energy and Low-Carbon Technology, Sichuan University, Chengdu 610065,  
China)

Tel.: +86 28 85407335; Fax: +86 28 85466916.

E-mail: [ygchen60@aliyun.com](mailto:ygchen60@aliyun.com)

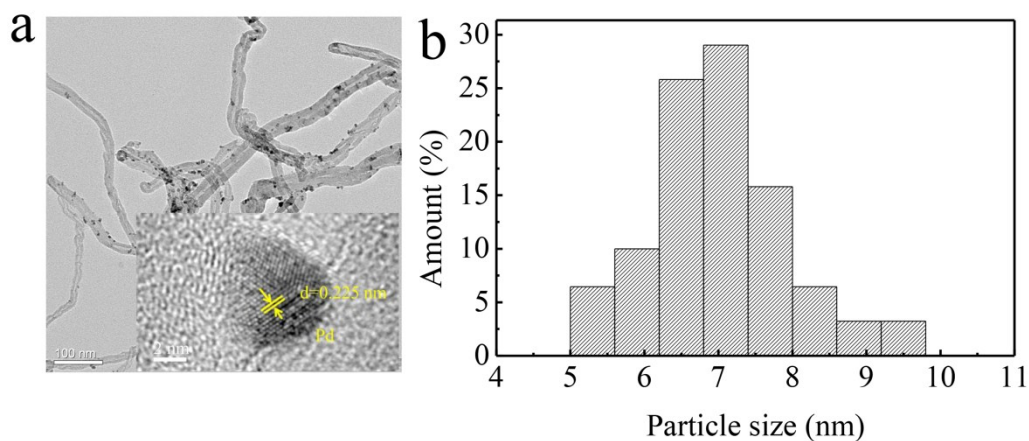

**Fig. S1** (a) TEM image of the CNTs@Pd (inset shows HRTEM image of a single Pd particle). (b) The histogram image of the distribution of Pd particle size.

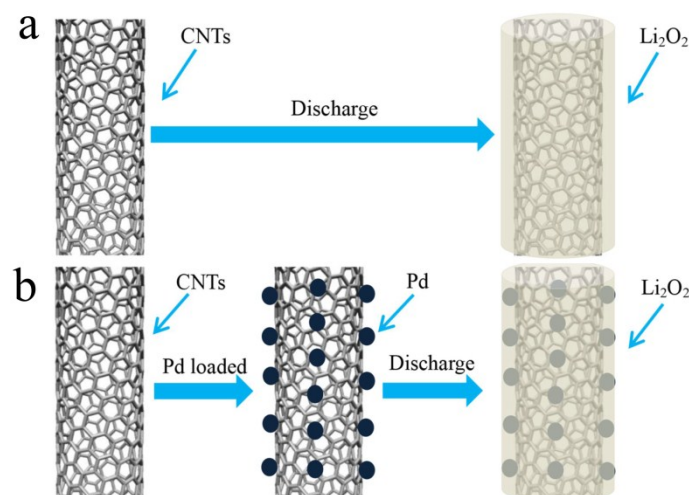

**Fig. S2** Schematic diagram of the depositing of Li<sub>2</sub>O<sub>2</sub> in CNTs (a) and the depositing of Pd nanoparticles on CNTs and the corresponding depositing of Li<sub>2</sub>O<sub>2</sub> in CNTs@Pd (b).

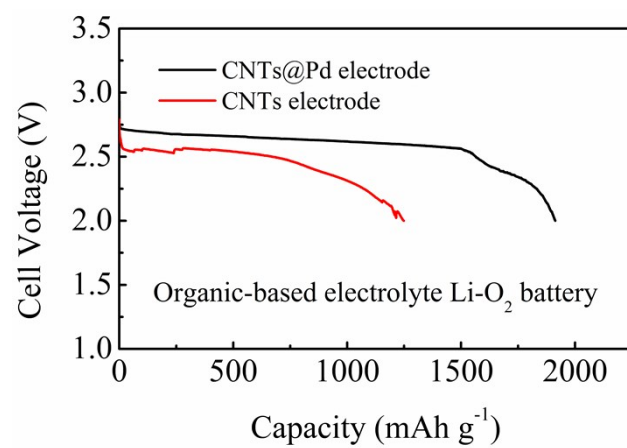

**Fig. S3** Discharge profiles of the CNTs@Pd and CNTs electrodes at 100 mA g<sup>-1</sup>.
